# Supplementary material
Source: ML conference proceedings conference paper supplement (https://openaccess.thecvf.com/content/CVPR2023/html/Hu_REVEAL_Retrieval-Augmented_Visual-Language_CVPR_2023_paper.html)
Supplement: Supplementary file 1 [file Hu_REVEAL_Retrieval-Augmented_Visual-Language_CVPR_2023_supplemental.pdf]

# REVEAL: Retrieval-Augmented Visual-Language Pre-Training with Multi-Source Multimodal Knowledge Memory

Ziniu Hu<sup>1\*</sup>, Ahmet Iscen<sup>2</sup>, Chen Sun<sup>2</sup>, Zirui Wang<sup>2</sup>, Kai-Wei Chang<sup>1</sup>, Yizhou Sun<sup>1</sup>  
 Cordelia Schmid<sup>2</sup>, David A. Ross<sup>2</sup>, Alireza Fathi<sup>2</sup>  
<sup>1</sup>University of California, Los Angeles, <sup>2</sup>Google Research

| Input Image & Question :                                                                                                                     | Top-2 Retrieved Knowledge:                                                                                                                                                                                                                                                                                                                                                                                                                                                                                                                 |                                                                                                                                                                                                                                                                                                                                                                                                                                                                                                                                                                                                                                                                      |                                                                                        |
|----------------------------------------------------------------------------------------------------------------------------------------------|--------------------------------------------------------------------------------------------------------------------------------------------------------------------------------------------------------------------------------------------------------------------------------------------------------------------------------------------------------------------------------------------------------------------------------------------------------------------------------------------------------------------------------------------|----------------------------------------------------------------------------------------------------------------------------------------------------------------------------------------------------------------------------------------------------------------------------------------------------------------------------------------------------------------------------------------------------------------------------------------------------------------------------------------------------------------------------------------------------------------------------------------------------------------------------------------------------------------------|----------------------------------------------------------------------------------------|
| <br>Q: Where is this sport typically played?                | <br>Source: VQA-v2<br>Question: What brand of racket is he using?<br>Answer: wilson,<br><br>Question: What is written on his socks?<br>Answer: crts / sports                                                                                                                                                                                                                                                                                              | <br>Source: VQA-v2<br>Question: What does the man's face indicate he is doing?<br>Answer: hitting ball, serving,<br><br>Question: What sport is being played?<br>Answer: <u>tennis</u>                                                                                                                                                                                                                                                                                                                                                                                              | Ground-truth: tennis court / park / Europe<br><br>Our Prediction: tennis court         |
| <br>Q: This type of bus can be found in what popular city? | <h3>Trolleybuses in San Francisco</h3> <p>From Wikipedia, the free encyclopedia</p> <p>The <b>San Francisco trolleybus system</b> forms part of the public transportation network serving San Francisco, in the state of California, United States. Opened on October 6, 1935,<sup>[2]</sup> it presently comprises 15 lines, and is operated by the San Francisco Municipal Railway, commonly known as <i>Muni</i> (or the Muni), with around 300</p>  | <h3>Nancy Guided Light Transit</h3> <p>From Wikipedia, the free encyclopedia</p> <p>The <b>Nancy Guided Light Transit</b> or TVR is a guided bus system in Nancy, France. The system uses Bombardier's TVR (French: <i>Transport sur Voie Réservee</i>) technology. The TVR replaced the trolleybus system in Nancy.<sup>[1]</sup></p> <p>Contents [hide]</p> <ol style="list-style-type: none"> <li>Vehicles</li> <li>History             <ol style="list-style-type: none"> <li>Planned closure and replacement</li> </ol> </li> <li>See also</li> <li>References</li> </ol>  | Ground-truth: San Francisco / London / Portland<br><br>Our Prediction: San Francisco   |
| <br>Q: Where is everyone rushing?                         | <br>Source: CC12M<br>Caption: A student with a backpack looks up at the <u>train</u> schedule .                                                                                                                                                                                                                                                                                                                                                         | <br>Source: CC12M<br>Caption: Passengers try to board a south western railway <u>train</u>                                                                                                                                                                                                                                                                                                                                                                                                                                                                                       | Ground-truth: Train Station / Plane Terminal Gate<br><br>Our Prediction: Train Station |
| <br>Q: What type of cell phone is in the photo?           | <br>Source: CC12M<br>Caption: A cell phone opened up showing off its screen articulation                                                                                                                                                                                                                                                                                                                                                                | <h3>Mini survival kit</h3> <p>From Wikipedia, the free encyclopedia</p> <p>A <b>mini survival kit</b> contains essential outdoor survival tools and supplies. It is intended to be carried on one's person at all times, be appropriate to all environments, and be a comprehensive kit without being too large. Mini survival kits are intended to provide the basic needs of a survival situation, self-rescue, assistance or a return to normalcy in optimum situations.</p> <p>Two philosophies surround the</p>                                                             | Ground-truth: Flip phone / motorola / LG<br><br>Our Prediction: Flip phone             |

Figure 1. Examples of VQA pairs from OKVQA benchmark that REVEAL correctly generate the answer.

\*This work was done when Ziniu was an intern at Google.

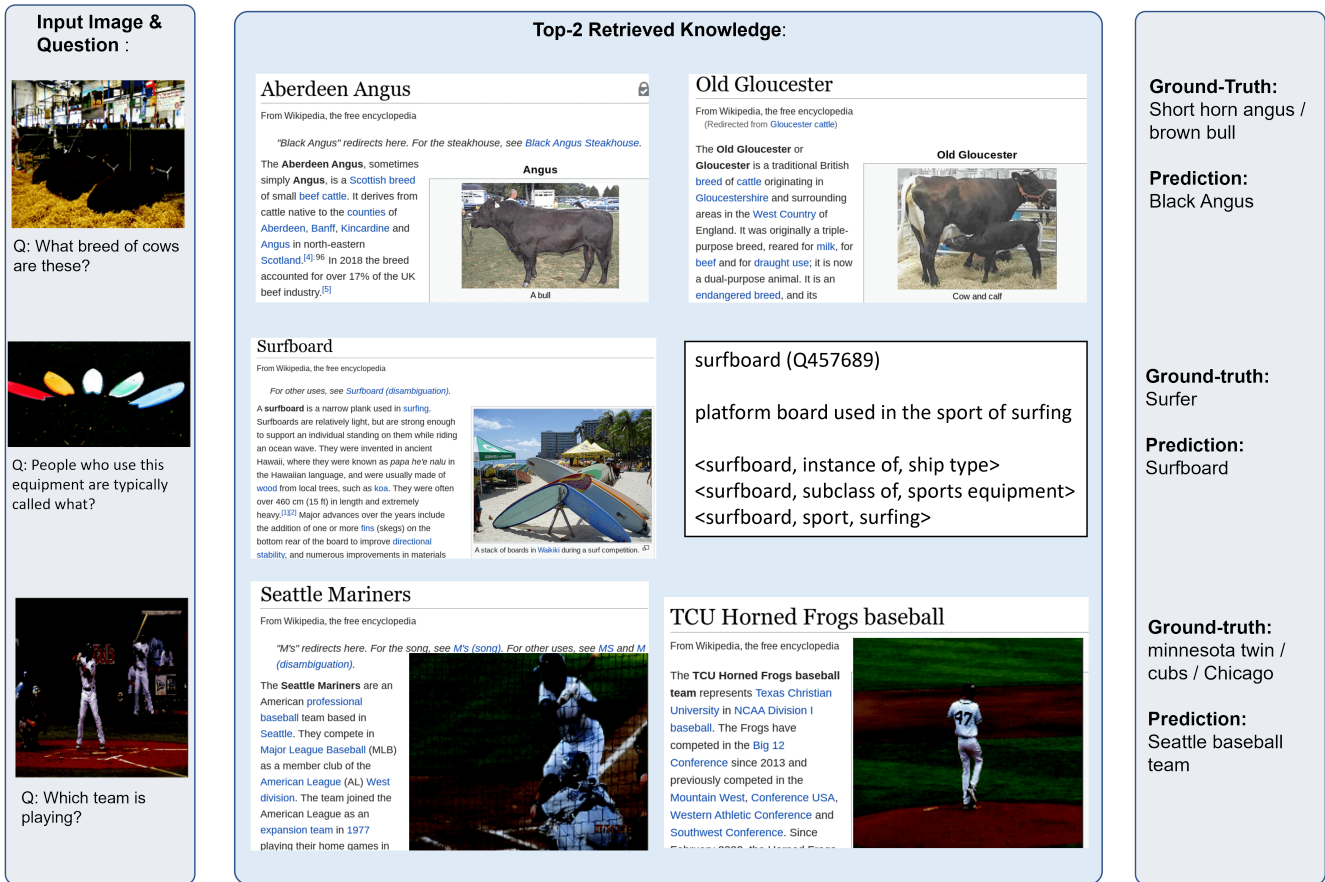

Figure 2. Examples of VQA pairs from OKVQA benchmark that REVEAL make wrong prediction.

## A. More Qualitative Examples

We show examples of visual question answering and image captions in Figure 1-3.

For visual question answering, we select four examples that correctly answer the question in Figure 1, and three examples that our model predicts wrongly. For both cases, the REVEAL could learn to retrieve relevant information from diverse knowledge sources. For example, in the first question in Figure 1, REVEAL retrieves two VQA pairs from VQA-v2 datasets relevant to tennis playing to provide information, and in the second question REVEAL correctly retrieves the Wikipedia page about trolleybus in San Francisco to answer where the bus might appear. The third example utilizes the image caption pairs from CC12M, which encodes the commonsense knowledge that a crowd of people might indicate they are rushing towards the train station to catch up deadline. These examples show that the corpus gating module in REVEAL could help identify the most useful knowledge source for different questions. In addition, the Top-100 retrieved knowledge might come from different knowledge sources, and the model could jointly reason with these di-

verse knowledge entries to get correct answers.

We are also interested to see whether the retrieved knowledge still makes sense for those QA pairs that REVEAL does not make the correct prediction. In Figure 2 we show such examples. For the first question asking the breed of cows, REVEAL retrieves two species of cow, one from Aberdeen Angus, a formal name for black Angus, and the other is Gloucester. The model’s prediction, i.e., “Black Angus” is mainly based on the Top-1 retrieved knowledge. Though this prediction is not listed in the ground-truth answers, it is very close to the ground-truth short-horn Angus. Similarly, in the second question that asks the name of surfing equipment, our model retrieves both the Wikipedia page and Wikidata triplets about surfboard and generates this as the answer. Though it is not exactly the same as a ground-truth answer, i.e., “surfer”, we think it is another way to say about this equipment. Similar to these two examples, there are many other ones that our model retrieves relevant information but the predicted results are not the same as the ground-truth. Also there are several examples in which the retrieved knowledge is less useful. For example, in the third question that

| Input Image                                                                         | Top-2 Retrieved Knowledge:                                                                                                                                                                                                                                                                                                                                                                                                                                                                                                                                                                                                                                                                                                                                |                                                                                                                                                                                                                                                                                                                                                                                                                                                                                                                                                                                                                                                                                                                                                                                                                                                                                                             | Generated Caption:                                                                                                          |
|-------------------------------------------------------------------------------------|-----------------------------------------------------------------------------------------------------------------------------------------------------------------------------------------------------------------------------------------------------------------------------------------------------------------------------------------------------------------------------------------------------------------------------------------------------------------------------------------------------------------------------------------------------------------------------------------------------------------------------------------------------------------------------------------------------------------------------------------------------------|-------------------------------------------------------------------------------------------------------------------------------------------------------------------------------------------------------------------------------------------------------------------------------------------------------------------------------------------------------------------------------------------------------------------------------------------------------------------------------------------------------------------------------------------------------------------------------------------------------------------------------------------------------------------------------------------------------------------------------------------------------------------------------------------------------------------------------------------------------------------------------------------------------------|-----------------------------------------------------------------------------------------------------------------------------|
|    | <p><b>Source:</b> CC12M</p> <p><b>Caption:</b> Big rub with towels, room, the lovely family home</p>                                                                                                                                                                                                                                                                                                                                                                                                                                                                                                                                                                                                                                                      | <p><b>Bathroom</b></p> <p>From Wikipedia, the free encyclopedia</p> <p>A <b>bathroom</b> or <b>washroom</b> is a room, typically in a home or other residential building, that contains either a bathtub or a shower (or both). The inclusion of a wash basin is common. In some parts of the world (e.g. India, a toilet is typically included in the bathroom; in others, the toilet is typically given a dedicated room separate from the one allocated for personal hygiene activities. In North-American English the word "bathroom" is sometimes used to refer to any room in a residence that contains a toilet, regardless of the inclusion of a bath or shower.</p> <p>Historically, bathing was often a collective activity, which took place in <b>public baths</b>. In some countries the shared social</p>  | <p><b>Generated Caption:</b><br/>A bathroom with folded towels hung next to the window</p>                                  |
|    | <p><b>Stuffed toy</b></p> <p>From Wikipedia, the free encyclopedia</p> <p>"<b>Stuffed animal</b>" redirects here. For the practice of stuffing and mounting dead animals, see <b>taxidermy</b>. "Cuddly toy" redirects here. For the song, see <i>Cuddly Toy</i> (song).</p> <p>A <b>stuffed toy</b> is a toy doll with an outer fabric sewn from a textile and stuffed with flexible material. They are known by many names, such as <b>plush toys</b>, <b>plushies</b>, <b>stuffed animals</b>, and <b>stuffedies</b>. In Britain and Australia, they may also be called <b>soft toys</b> or <b>cuddly toys</b>. The stuffed toy originated from the <b>Stoff</b></p>  | <p><b>Source:</b> CC12M</p> <p><b>Caption:</b> my beloved &lt;person &gt; <b>bear</b> , posing with the postcard i sent ! look for that sign to find the store that sells stamps .</p>                                                                                                                                                                                                                                                                                                                                                                                                                                                                                                                                                                                                                                     | <p><b>Generated Caption:</b><br/>a white bear stuffed toy laying on a bed</p>                                               |
|    | <p><b>Slalom skiing</b></p> <p>From Wikipedia, the free encyclopedia</p> <p><i>This article is about the snow skiing discipline. For the water skiing activity, see <b>Water Skiing</b> § Slalom.</i></p> <p><b>Slalom</b> is an alpine skiing and alpine snowboarding discipline, involving skiing between poles or gates. These are spaced more closely than those in <b>giant slalom</b>, <b>super giant slalom</b> and <b>downhill</b>, necessitating quicker and shorter turns. Internationally, the sport is contested at the <b>FIS Alpine</b></p>                                                                                                                | <p><b>Natália Šubrtová</b></p> <p>From Wikipedia, the free encyclopedia</p> <p><b>Natália Šubrtová</b> (born 1 May 1989 in Kežmarok)<sup>[1]</sup> is a retired Slovak alpine skier, sighted guide and eleven-time Paralympic Champion.</p> <p>As the sighted guide for <b>Henrieta Farkašová</b>, she has won three gold at the <b>2010 Winter Paralympics</b>, at Whistler Creekside in the <b>Women's giant slalom</b>, <b>Women's Super combined</b>, <b>Women's Super-G</b>.</p>                                                                                                                                                                                                                                                                                                                                     | <p><b>Generated Caption:</b><br/>a young woman skis down a hill wearing red suit</p>                                        |
|   | <p><b>Source:</b> CC12M</p> <p><b>Caption:</b> six small white bowls filled with different flavors of roasted <b>pumpkin seeds</b> . bowls are placed on a white marble countertop .</p>                                                                                                                                                                                                                                                                                                                                                                                                                                                                                | <p><b>Apple</b></p> <p>From Wikipedia, the free encyclopedia</p> <p><i>This article is about the fruit. For the technology company, see <b>Apple Inc.</b> For other uses, see <b>Apple (disambiguation)</b>.</i></p> <p>"<b>Apple tree</b>" redirects here. For other uses, see <b>Apple tree (disambiguation)</b>.</p> <p>An <b>apple</b> is an edible fruit produced by an <b>apple tree</b> (<i>Malus domestica</i>). <b>Apple trees</b> are cultivated worldwide and are the most widely grown species in the genus <i>Malus</i>. The tree originated</p>                                                                                                                                                                                                                                                           | <p><b>Generated Caption:</b><br/>a pile of chopped apple peels on a wooden board with a knife and roasted pumpkin seeds</p> |
|  | <p><b>Source:</b> CC12M</p> <p><b>Caption:</b> boys playing on an ipad</p>                                                                                                                                                                                                                                                                                                                                                                                                                                                                                                                                                                                             | <p><b>sibling (Q31184)</b></p> <p>one of two or more individuals having at least one parent in common</p> <p>instance of, kinship subclass of, first-degree relative has part(s), brother / sister</p>                                                                                                                                                                                                                                                                                                                                                                                                                                                                                                                                                                                                                                                                                                      | <p><b>Generated Caption:</b><br/>Siblings sitting on a bench looking on their mobile phones</p>                             |
|  | <p><b>Source:</b> CC12M</p> <p><b>Caption:</b> 33 % off a visit to exotic-animal park</p>                                                                                                                                                                                                                                                                                                                                                                                                                                                                                                                                                                              | <p><b>Askania-Nova</b></p> <p>From Wikipedia, the free encyclopedia</p> <p><i>For settlement, see <b>Askania-Nova (urban-type settlement)</b>.</i></p> <p><b>Askania-Nova</b> (Ukrainian: Асканія-Нова) is a Ukrainian nature reserve located in Kherson Oblast, Ukraine, within the dry Taurids steppe near Oleksky Sands and active member of the UNESCO Man and the Biosphere Programme. It is also a research institute of the Ukrainian Academy of Agricultural Sciences. The reserve consists of a zoological park, a botanical (dentrological) garden, and an open territory of virgin steppes.</p>                                                                                                                                                                                                              | <p><b>Generated Caption:</b><br/>zebras walk by side inside a reserve's enclosure</p>                                       |
|  | <p><b>Source:</b> CC12M</p> <p><b>Caption:</b> man serving up a nice , crusty pizza in front of a big wood-fired pizza oven</p>                                                                                                                                                                                                                                                                                                                                                                                                                                                                                                                                        | <p><b>Source:</b> CC12M</p> <p><b>Caption:</b> man grilling a smoking hot delicious meat closeup , white steam visible . outdoor grill , bbq , tasty street food , barbecue</p>                                                                                                                                                                                                                                                                                                                                                                                                                                                                                                                                                                                                                                          | <p><b>Generated Caption:</b><br/>A man serving out pizza into a tray to customer.</p>                                       |

Figure 3. Examples of generated Caption on MSCOCO image captioning dataset.

asks which baseball team is in the image, though our model retrieves several other baseball teams, they are not the same

as the ground-truth ones. For these complex questions, it is still space for our model to improve and learn the subtle



| Setting                            | $K=10$ | $K=20$ | $K=50$ | $K=100$ |
|------------------------------------|--------|--------|--------|---------|
| $c = 64$ (Perceiver)               | 50.9   | 53.2   | 54.5   | /       |
| $c = 32$ (Perceiver)               | 51.3   | 53.7   | 54.8   | 55.2    |
| $c = 16$ (Perceiver)               | 50.7   | 52.9   | 54.1   | 54.5    |
| $c = 32$ w/o $\mathcal{L}_{decor}$ | 50.8   | 53.1   | 54.3   | 54.6    |
| $c = 32$ w/o $\mathcal{L}_{align}$ | 50.9   | 53.5   | 54.6   | 54.8    |
| First 32 tokens of Encoder         | 49.7   | 51.8   | 52.3   | 53.1    |

Table 1. **Hyperparameter Sensitivity Analysis:**  $K$  denotes number of retrieved knowledge entries, and  $c$  denotes the number of compressed token for Perceiver model. We also add another naive baseline which simply take the encoder’s first 32 tokens as compression results. Performance is evaluated by fine-tuning a pre-trained REVEAL-Base to OKVQA task.

information from the image to retrieve correct knowledge.

For image captioning, we also show 7 examples in Figure 3. Though image captioning does not rely too much on outside knowledge, our model could still leverage some retrieved knowledge to generate interesting results. In the 5-th example, the model retrieves the definition of sibling, which is a good guess for the relationship between the two kids in the image, and generates sibling in the output caption. In the 6-th example, the model retrieves several knowledge relevant to wildlife reserve, and also generates them. Both the VQA and Image Captioning examples show the effectiveness of the retrieval module for these visual-language tasks.

## B. Hyper-parameter Sensitivity Analysis

REVEAL consists of two key hyperparameters to achieve good performance: the number of compressed tokens  $c$  and the number of retrieved knowledge  $K$ . We thus conduct sensitivity analysis to investigate how the choice of these two hyperparameters influences final performance.

We take REVEAL-Base architecture, pre-training with different compressed tokens  $c \in [16, 32, 64]$  with retrieved knowledge  $K = 10$ . We then fine-tune on downstream OK-VQA datasets with different retrieved knowledge  $K \in [10, 20, 50, 100]$ . We do not change  $K$  during the pre-training stage because of the vast computational cost of pre-training, and we set  $K = 10$  as a balance between training effectiveness and scalability. While during fine-tuning, it is easy to enumerate different  $K$  and study the effects. The results are shown in Table 1.

**Analyzing number of retrieved knowledge  $K$**  From the results, we can first see that increasing number of retrieved knowledge  $K$  could consistently improve the performance, and the improvement is not significantly different from 50 and 100. This fits our hypothesis that we require to jointly reason over multiple knowledge to make correct prediction.

| Pre-Training Corpus            | OKVQA Accuracy |
|--------------------------------|----------------|
| WIT (5M)                       | 51.1           |
| WIT w/o $\mathcal{L}_{contra}$ | 47.6           |
| CC12M (12M)                    | 53.6           |
| Web-Image-Text (1.3B)          | 55.2           |

Table 2. **Ablation on Pre-Training Corpus:** We pre-train REVEAL-Base on WIT and CC12M dataset, and report the fine-tuned OKVQA performance.

To strike a balance between performance and efficiency, we choose to use  $K = 100$  for all fine-tuning tasks.

**Analyzing numbers of compressed tokens  $c$**  Regarding value compression, we first compare different numbers of compressed tokens  $c$  for the Perceiver model. For each different  $c$  we pre-train the REVEAL-Base from scratch and report their fine-tuning results. As is shown in the table,  $c = 32$  achieves the best performance, even higher than  $c = 64$ . This is probably because 32 tokens are enough to encode the knowledge information via proper modeling and disentangle regularization. By further increasing the number of tokens, the added capacity will not bring more critical information. Therefore, we choose  $c = 32$  throughout our study.

**Analyzing regularization for Perceiver** Besides, we also conduct ablation of the two regularization loss we added to guide learning a more informative compression model. we report the result pre-trained without de-correlation loss  $\mathcal{L}_{decor}$  and without alignment loss  $\mathcal{L}_{align}$ . As shown in the second block of the table, each regularization loss plays an important role in the final performance, and incorporating both could lead to optimal performance.

**Another baseline for knowledge compression** We further add another naive baseline for compression: take the first 32 tokens from the encoder, i.e.,  $b(z)[ : 32 ]$ . As is illustrated, this method performs much worse than Perceiver, probably because the first 32 tokens in the input sentence are not always the best summarization of the whole knowledge. At the same time, Perceiver could use cross-attention to query the whole sequence properly, and keep the most important information.

## C. Ablation on Pre-Training Corpus

Our REVEAL model by default is pre-trained on the 1 billion Web-Image-Text datasets to achieve good performance. Therefore, one natural question is whether the performance improvement relies on the large-scale corpus. We thus also report two results that pre-train our model on WIT and



| Setting     | Retrieve from WIT | Retrieve from All |
|-------------|-------------------|-------------------|
| Frozen ViT  | 49.5              | 50.4              |
| Trained ViT | 51.8              | 53.0              |
| Ours        | 53.1              | 55.2              |

Table 3. **Compare with Visual-Only Retrieval:** We use ViT-only (frozen or trained) as retriever, retrieve knowledge from WIT or all four corpora.

CC12M only. The results are illustrated in Table 2. As shown, using a much smaller corpus like CC12M for pre-training, the performance is -1.6 lower than the one pre-trained on 1.3B Web-Image-Text dataset. This shows that our retrieval-augmented pre-training framework could still get good results even with a smaller corpus. By scaling up the pre-training corpus, the model could always learn better generation and retrieval results to achieve optimal performance.

We also conduct an ablation study to remove the retrieval warm-start, i.e.,  $\mathcal{L}_{contra}$  from WIT. This led to a performance drop of -3.5. This matches our intuition that without good initialization for the retrieval module, the retriever would often return irrelevant memory items that would never generate proper training signals, leading to the cold-start problem. Therefore, for all results, we start with a checkpoint pre-trained on WIT with  $\mathcal{L}_{contra}$  as a warm-start.

## D. Using Visual-Only Retrieval as Baseline

In REVEAL we use upper-layer T5 module as both the query Head  $\phi_{Query}(\cdot)$  and the key Head  $\phi_{Key}(\cdot)$  to compute the query embedding and memory keys. This allow the model using both visual and textual information to conduct retrieval, but requires further training to fuse the two modality. In Table 6, we already show that image-to-text matching paradigm (using pre-trained ALIGN) doesn’t perform better than our method. Another straightforward baseline is to only utilize the visual feature, i.e., only using the ViT embedding output for retrieval. We thus adding two additional baseline, which use the frozen ViT (directly from pre-trained checkpoint without additional training) or trained ViT (using our retrieval-augmented pre-training, but replace the retrieval head with this ViT) for retrieval. As our knowledge corpora also contains some text-only data such as WikiData, for fair comparison, we compare our method with ViT-based retriever by retrieving from WIT or all the four corpora. As illustrated in Table 3, using ViT as retriever indeed achieves relatively high performance. When retrieving from WIT and all, the trained ViT only achieve performance -1.3 and -2.2 lower than our image-text model as retriever, and significantly higher than using the ALIGN model for retrieval. This shows that the visual feature plays a very important role

for retrieving necessary knowledge. Comparing with the frozen ViT, the trained ViT achieve +2.3 and +2.6 higher performance on the two settings. This shows that our retrieval-augmented training is also useful for getting better retriever, even we directly start from strong ViT checkpoint.

## E. More Implementation Details of Model

In this section, we provide more details of our model architecture, specifically the Perceiver, Attentive fusion module and online distributed MIPS retrieval.

### E.1. Perceiver as Value Compression Head

As we described in the method section of the submission, we propose to compress the full token embedding sequence into a shorter sequence by using the Perceiver model [?].

Perceiver is a standard Transformer Decoder model that uses a learnable latent embedding  $\text{Emb}_{\text{Latent}}$  as input query, and the full embedding sequence to be compressed  $b(z)$  as key and value. For each layer, the perceiver first uses a cross-attention module to compress a  $l$ -length full embedding sequence  $b(z) \in \mathbb{R}^{I \times d}$  into the  $c$ -length queries by  $\text{Emb}_{\text{Latent}} \in \mathbb{R}^{c \times d}$ , followed by self-attention in the latent space. We write the full compression operation as below:

---

#### Algorithm 1 Perceiver Operation ( $\psi(\cdot)$ )

---

**Input:**  $Z^0 = \text{Emb}_{\text{Latent}} \in \mathbb{R}^{c \times d}$ ,  
 $B = \text{LayerNorm}(b(z)) \in \mathbb{R}^{I \times d}$   
**for** layer  $l$  **for** each Perceiver layers **do**  
 $\hat{Z}^l = \text{LayerNorm}(Z^{l-1})$   
 $\hat{Z}^l = \text{Cross-Attn}(\text{Query}=\hat{Z}^l, \text{Key\&Value}=B) + Z^{l-1}$   
 $\hat{Z}^l = \text{Self-Attention}(\text{LayerNorm}(\hat{Z}^l)) + \hat{Z}^l$   
 $Z^l = \text{MLP}(\text{LayerNorm}(\hat{Z}^l)) + \hat{Z}^l$   
**end for**  
**Return:**  $\psi(b(z)) = Z^L \in \mathbb{R}^{c \times d}$

---

We denote  $Z^l$  as  $l$ -th layer’s output, and  $\hat{Z}^l$  as intermediate representation. After stacking  $L$  Perceiver layers, we could learn a meaningful short  $c$ -length compressed embedding sequence  $Z^L$  to represent the original full sequence. To implement Perceiver that is consistent with the remaining model architecture, we use the standard T5 Decoder with randomly initialized latent embedding  $\text{Emb}_{\text{Latent}}$ .

## F. Attentive Fusion

In this section, we provide more details about the Attentive fusion module in our model. The attentive fusion module aims to allow end-to-end training of the retriever and generator weights. Without this fusion module, the retriever is not involved in the final answer generation procedure and will not receive gradients. Some of the previous work [?, ?, ?] utilize alternative training signals for updating retriever. They

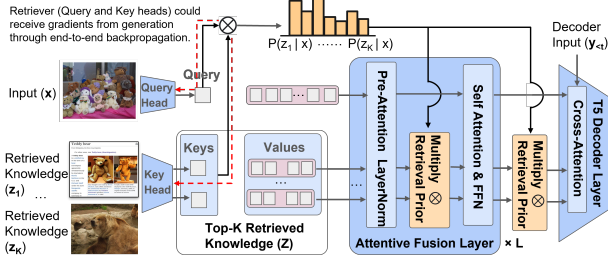

Figure 4. Detailed procedure of attentive knowledge fusion module. We inject retrieval probability as a prior to knowledge token embeddings, so the retriever can receive gradients via back-propagating over {self/cross}-attention part.

conduct generation using one knowledge entry at a time instead of using all Top-K and use the corresponding generation accuracy as the training signal. This approach is not guaranteed to be optimal for multi-knowledge retrieval. It is also very inefficient if we want to retrieve up-to-hundred knowledge items.

Our solution is to inject the retrieval score as a soft attention mask into the fusion and decoding process, as is illustrated in Figure 4. At each Transformer Layer before attention calculation, we multiply the retrieval probability  $p(z_i|x)$  to each token embedding belonging to knowledge  $z_i$ . We denote the concatenated query embedding and memory values as  $X = [b(x), \psi(b(z_1)), \dots, \psi(b(z_K))]$  in  $\mathbb{R}^{(I+c \cdot K) \times d}$ , where  $I$  is the number of tokens of the input query  $x$  and  $c$  is the number of compressed tokens. Based on the top- $K$  retrieved knowledge  $Z = [z_1, \dots, z_K]$  with key and value embeddings, we could calculate the probability over these top- $K$  knowledge similar to eq.(3):

$$p(z_i | x) = \frac{\exp(\text{Gate}_{\mathcal{MI}(z_i)}(x) \cdot \text{Rel}(x, z_i) / \tau)}{\sum_{j=1}^K \exp(\text{Gate}_{\mathcal{MI}(z_j)}(x) \cdot \text{Rel}(x, z_j) / \tau)}, \quad (1)$$

$$\text{where } \text{Rel}(x, z_i) = \text{Emb}_{\text{Query}}(x)^T \cdot \text{Emb}_{\text{Key}}(z_i) \quad (2)$$

$$= \phi_{\text{Query}}(b(x))^T \cdot \phi_{\text{Key}}(b(z_i)) \quad (3)$$

Here we denote  $\mathcal{MI}(z_i)$  as the indicator function returning corpus ID of retrieved knowledge  $z_i$ , such that  $\mathcal{M}^j = \mathcal{MI}(z_i^j)$ . Note that the difference of this probability within Top-K results differ with eq.(??) in that we only summing over the  $K$  subset results, and also we merge the gating score into the softmax to make the output a probability that summing to one. We then construct a latent soft attention mask over  $X$  as:

$$\text{Mask}_{\text{att}} = \left[ \underbrace{[1, \dots, 1]}_{\text{repeat} \times l}, \underbrace{[p(z_1 | x), \dots, p(z_1 | x)]}_{\text{repeat} \times c}, \dots, \underbrace{[p(z_K | x), \dots, p(z_K | x)]}_{\text{repeat} \times c} \right]. \quad (4)$$

Then, within the attentive fusion module, we multiply this attention mask  $\text{Mask}_{\text{att}}$  to the whole embedding sequence. We write the full attentive fusion operation as below:

---

### Algorithm 2 Attentive Fusion Operation ( $F(\cdot)$ )

---

**Input:**  $X^0 = [b(x), \psi(b(z_1)), \dots, \psi(b(z_K))]$ ,  
**Calculate**  $\text{Mask}_{\text{att}} \in \mathbb{R}^{(I+c \cdot K) \times 1}$  following Eq.(4),  
**for** layer  $l$  for each Fusion layers **do**  
 $\hat{X}^l = \text{Mask}_{\text{att}} \cdot \text{LayerNorm}(X^{l-1})$   
 $\hat{X}^l = \text{Self-Attention}(\hat{X}^l) + X^{l-1}$   
 $X^l = \text{MLP}(\text{LayerNorm}(\hat{X}^l)) + \hat{X}^l$   
**end for**  
**Return:**  $F(X) = X^L \in \mathbb{R}^{(I+c \cdot K) \times d}$

---

We denote  $X^l$  as  $l$ -th layer's output, and  $\hat{X}^l$  as intermediate representation. The critical difference is shown in eq.(4), in which we multiply  $\text{Mask}_{\text{att}}$  to the pre-normalized representation (T5 utilizes pre-norm which satisfies our purpose). In this way, when we calculate the attention within the self-attention operation, the attention scores each knowledge sends to other position  $a_{:,i}$  is proportional to  $p(z_i|x)$ . This reflects the importance of this knowledge  $z_i$  to make the final prediction. By multiplying the retrieval score as prior and through end-to-end training, the retriever could be learned to identify those samples that are more important to final output generation. This is similar to adopting a posterior estimation  $p(z|x, y)$ , which takes output answer  $y$  as condition, to optimize the retriever model better.

This modified retrieval injected fusion layer is also similar to the Mixture-of-Expert (MOE) model, in which the retrieval is like a gating layer to select knowledge, and the knowledge representation serves as the expert. In this way, we turn the discrete knowledge retrieval/selection learning into a continuous learning problem, and the whole model could be learned end-to-end.

### F.1. Online Distributed MIPS Retrieval

To strike a balance between training efficiency and scalability, we store the key embedding memory on TPU, and store the value sequence embeddings (each sequence contains  $c = 32$  token embeddings) and raw dataset in the local host's CPU memory. Then, when doing retrieval, each device first conduct MIPS operation over on-device memory to find local Top-K entry ID, then syncs the results across TPU devices to get global Top-K, and then returns the corresponding results. The detailed procedure is as follows:

This distributed retrieval could be done in a hierarchical manner if we group multiple TPUs into the same host, so we could first find Top-K by syncing within each host, and then syncing across host to find global Top-K, which further reduce the communication redundancy.

---

**Algorithm 3** Online Distributed MIPS Retrieval

---

**Input:** Batch query  $\text{Emb}_{\text{Query}} \in \mathbb{R}^{\text{bsz} \times d}$ , Local On-TPU key embeddings  $\text{Key}(\mathcal{M}) \in \mathbb{R}^{|\mathcal{M}| \times d}$ , Local On-CPU values  $\text{DB}(\mathcal{M})$ .

**For each TPU device:**

$\hat{\text{Emb}}_{\text{Query}} = \text{Gather}(\text{Emb}_{\text{Query}})$

$\text{local\_scores} = \hat{\text{Emb}}_{\text{Query}}^T \cdot \text{Emb}_{\text{Key}}(\mathcal{M})$

$\text{local\_ids} = \text{Approx\_Top\_K}(\text{local\_scores})$

$\text{local\_vals} = \text{DB}(\mathcal{M}).\text{Lookup}(\text{local\_ids})$

$\text{global\_scores} = \text{Gather}(\text{local\_scores})$

$\text{global\_ids} = \text{Top\_K}(\text{global\_scores})$

**Return:**  $\text{Gather}(\text{local\_scores}).\text{Batch\_Select}(\text{global\_ids})$

---
